# Supplementary material for: Fine scale structural variants distinguish the genomes of Drosophila melanogaster and D. pseudoobscura.
Source: Springer Nature journal article supplement (doi:10.1186/gb-2006-7-7-r67), 2006-01-01

## Intron distances (flanking exon to 5'-breakpoint microinversion)

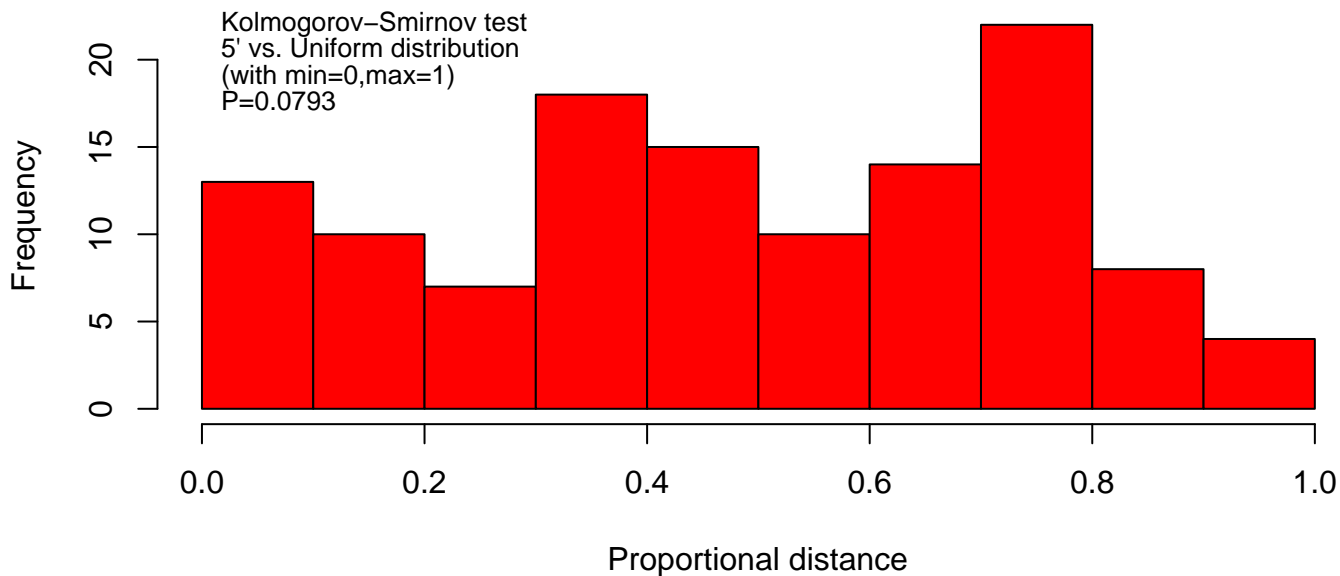

## Intron distances (flanking exon to 3'-breakpoint microinversion)

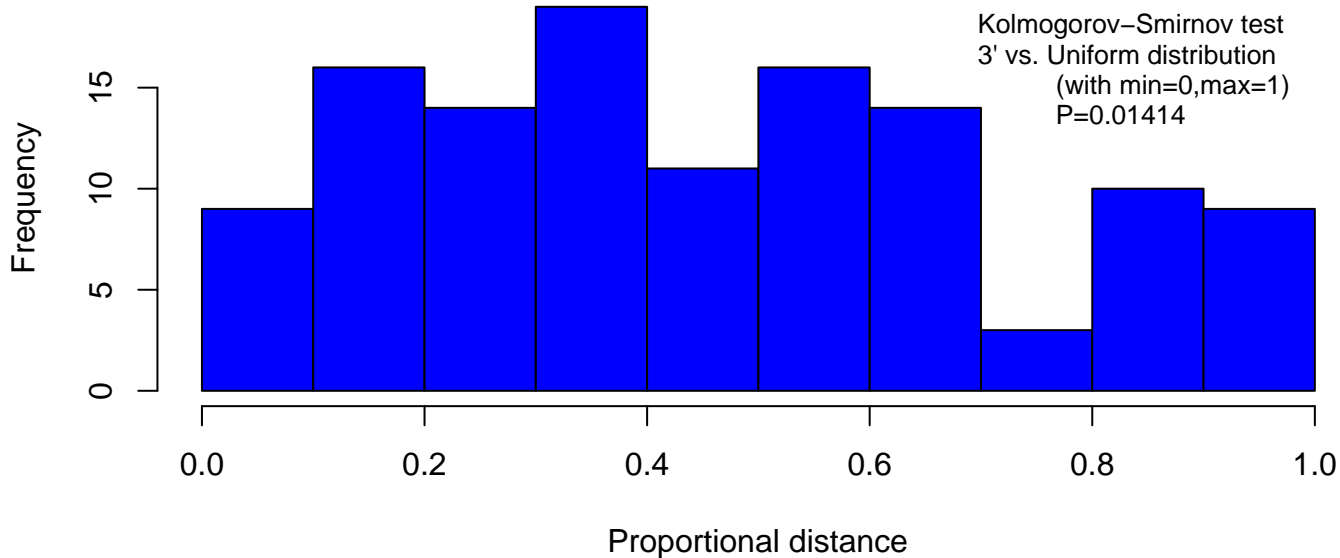

Supplement: Additional file 5 [file gb-2006-7-7-r67-s5.pdf]
